# Supplementary material for: Validation of SEPI in German—A German Translation of the Sun Exposure and Protection Index
Source: MDPI journal article supplement (doi:10.3390/ijerph17176172), 2020-08-25
Supplement: s1 [file s1]

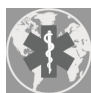

# Supplementary Materials: Validation of SEPI in German—A German Translation of the Sun Exposure and Protection Index

SEPI in English and in German

## Sun Exposure and Protection Index (SEPI) — Part I —

|                                                                                                        |                                                                                                                                                                                                                    |
|--------------------------------------------------------------------------------------------------------|--------------------------------------------------------------------------------------------------------------------------------------------------------------------------------------------------------------------|
| 1. How often do you sunbathe with the intention to get tanned?                                         | <input type="checkbox"/> 0 Never<br><input type="checkbox"/> 1 Seldom<br><input type="checkbox"/> 2 Occasionally<br><input type="checkbox"/> 3 Often<br><input type="checkbox"/> 4 Always                          |
| 2. How many times have you been sunburnt (redness and smarting pain) during the last 12 months?        | <input type="checkbox"/> 0 None<br><input type="checkbox"/> 1 1-2 times<br><input type="checkbox"/> 2 3-5 times<br><input type="checkbox"/> 3 6-10 times<br><input type="checkbox"/> 4 More than 10 times          |
| 3. How long do you usually stay in the sun (on average), between 11 am and 3 pm, on a typical day-off? | <input type="checkbox"/> 0 < 30 min<br><input type="checkbox"/> 1 30 min – 1 hour<br><input type="checkbox"/> 2 1-2 hours<br><input type="checkbox"/> 3 2-3 hours<br><input type="checkbox"/> 4 > 3 hours          |
| 4. How often do you take a holiday with the intention of spending more time in the sun?                | <input type="checkbox"/> 0 Never<br><input type="checkbox"/> 1 Seldom<br><input type="checkbox"/> 2 1-2 weeks a year<br><input type="checkbox"/> 3 3-5 weeks a year<br><input type="checkbox"/> 4 > 5 weeks a year |
| 5. When in the sun, how often do you use sunscreens?                                                   | <input type="checkbox"/> 0 Always<br><input type="checkbox"/> 1 Often<br><input type="checkbox"/> 2 Occasionally<br><input type="checkbox"/> 3 Seldom<br><input type="checkbox"/> 4 Never                          |
| 6. When in the sun, how often do you use covering clothes for sun protection?                          | <input type="checkbox"/> 0 Always<br><input type="checkbox"/> 1 Often<br><input type="checkbox"/> 2 Occasionally<br><input type="checkbox"/> 3 Seldom<br><input type="checkbox"/> 4 Never                          |
| 7. When in the sun, how often do you use a sun hat or cap for sun protection?                          | <input type="checkbox"/> 0 Always<br><input type="checkbox"/> 1 Often<br><input type="checkbox"/> 2 Occasionally<br><input type="checkbox"/> 3 Seldom<br><input type="checkbox"/> 4 Never                          |
| 8. How often do you stay indoors or in the shade in order to protect yourself from the sun?            | <input type="checkbox"/> 0 Always<br><input type="checkbox"/> 1 Often<br><input type="checkbox"/> 2 Occasionally<br><input type="checkbox"/> 3 Seldom<br><input type="checkbox"/> 4 Never                          |

## – Part II –

Choose for each item which statement is most consistent with your own state:

1. Sunbathing:
  - 4 ☐ I have never thought of giving up sunbathing.
  - 3 ☐ I could think of giving up sunbathing.
  - 2 ☐ I intend to give up sunbathing.
  - 1 ☐ I have recently given up sunbathing .
  - 0 ☐ I have for a long time avoided sunbathing
2. Sunscreens:
  - 4 ☐ I have never thought of using sunscreens.
  - 3 ☐ I could think of using sunscreens.
  - 2 ☐ I intend to start using sunscreens.
  - 1 ☐ I have started to use sunscreens.
  - 0 ☐ I have for a long time used sunscreens.
3. Covering clothes:
  - 4 ☐ I have never thought of using covering clothes for sun protection.
  - 3 ☐ I could think of using covering clothes for sun protection.
  - 2 ☐ I intend to start using covering clothes for sun protection.
  - 1 ☐ I have started to use covering clothes for sun protection.
  - 0 ☐ I have for a long time used covering clothes for sun protection.
4. Sun hat or cap:
  - 4 ☐ I have never thought of using a sun hat or cap for sun protection.
  - 3 ☐ I could think of using a sun hat or cap for sun protection.
  - 2 ☐ I intend to start using a sun hat or cap for sun protection.
  - 1 ☐ I have started to use a sun hat or cap for sun protection.
  - 0 ☐ I have for a long time used a sun hat or cap for sun protection.
5. The shade:
  - 4 ☐ I have never thought of trying to stay in the shade during the hours of strongest sun light.
  - 3 ☐ I could think of trying to stay in the shade during the hours of strongest sun light.
  - 2 ☐ I intend to start trying to stay in the shade during the hours of strongest sun light.
  - 1 ☐ I have started trying to stay in the shade during the hours of strongest sun light.
  - 0 ☐ I have for a long time tried to stay in the shade during the hours of strongest sun light.

## – Scoring instructions –

**SEPI part I:** For each question, the given response score (0-4 p), should be added together in a total score (0-32 p), reflecting *increasing UV risk exposure*.

**SEPI part II:** For each question, the given response score (0-4 p), should be added together in a total score (0-20 p), reflecting *decreasing propensity to increase sun protection*.

SEPI - part I  
score:

SEPI - part  
score:

### Sun Exposure and Protection Index (SEPI) – Teil I –

|                                                                                                                               |                                                                                                                                                                                                                           |
|-------------------------------------------------------------------------------------------------------------------------------|---------------------------------------------------------------------------------------------------------------------------------------------------------------------------------------------------------------------------|
| 1. Wie oft sonnenbaden Sie mit der Absicht braun zu werden?                                                                   | <input type="checkbox"/> 0 Nie<br><input type="checkbox"/> 1 Selten<br><input type="checkbox"/> 2 Manchmal<br><input type="checkbox"/> 3 Oft<br><input type="checkbox"/> 4 Immer                                          |
| 2. Wie oft haben Sie in den letzten 12 Monaten Sonnenbrand gehabt (Rötung und Schmerzen)?                                     | <input type="checkbox"/> 0 Nie<br><input type="checkbox"/> 1 1-2 Mal<br><input type="checkbox"/> 2 3-5 Mal<br><input type="checkbox"/> 3 6-10 Mal<br><input type="checkbox"/> 4 Mehr als 10 Mal                           |
| 3. Wie lange bleiben Sie normalerweise in der Sonne (im Durchschnitt), zwischen 11 und 15 Uhr, an einem typischen freien Tag? | <input type="checkbox"/> 0 < 30 Minuten<br><input type="checkbox"/> 1 30 Minuten – 1 Stunde<br><input type="checkbox"/> 2 1-2 Stunden<br><input type="checkbox"/> 3 2-3 Stunden<br><input type="checkbox"/> 4 > 3 Stunden |
| 4. Wie oft machen Sie Ferien mit der Absicht mehr Zeit in der Sonne zu verbringen??                                           | <input type="checkbox"/> 0 Nie<br><input type="checkbox"/> 1 Selten<br><input type="checkbox"/> 2 1-2 Wochen pro Jahr<br><input type="checkbox"/> 3 3-5 Wochen pro Jahr<br><input type="checkbox"/> 4 > 5 Wochen pro Jahr |
| 5. Wenn Sie in der Sonne sind, wie oft benutzen Sie Sonnencreme?                                                              | <input type="checkbox"/> 0 Immer<br><input type="checkbox"/> 1 Oft<br><input type="checkbox"/> 2 Manchmal<br><input type="checkbox"/> 3 Selten<br><input type="checkbox"/> 4 Nie                                          |
| 6. Wenn Sie in der Sonne sind, wie oft benutzen Sie bedeckende Kleidung als Sonnenschutz?                                     | <input type="checkbox"/> 0 Immer<br><input type="checkbox"/> 1 Oft<br><input type="checkbox"/> 2 Manchmal<br><input type="checkbox"/> 3 Selten<br><input type="checkbox"/> 4 Nie                                          |
| 7. Wenn Sie in der Sonne sind, wie oft benutzen Sie einen Sonnenhut oder eine Kappe als Sonnenschutz?                         | <input type="checkbox"/> 0 Immer<br><input type="checkbox"/> 1 Oft<br><input type="checkbox"/> 2 Manchmal<br><input type="checkbox"/> 3 Selten<br><input type="checkbox"/> 4 Nie                                          |
| 8. Wie oft bleiben Sie drinnen oder im Schatten, um sich vor der Sonne zu schützen?                                           | <input type="checkbox"/> 0 Immer<br><input type="checkbox"/> 1 Oft<br><input type="checkbox"/> 2 Manchmal<br><input type="checkbox"/> 3 Selten<br><input type="checkbox"/> 4 Nie                                          |

## – Teil II –

Wählen Sie bei jedem Punkt, welche Aussage am Besten auf Ihre eigene Lage zutrifft:

## 1. Sonnenbaden:

- 4 ☐ Ich habe nie daran gedacht das Sonnenbaden aufzugeben.  
 3 ☐ Ich könnte mir vorstellen das Sonnenbaden aufzugeben.  
 2 ☐ Ich habe die Absicht das Sonnenbaden aufzugeben.  
 1 ☐ Ich habe vor Kurzem das Sonnenbaden aufgegeben.  
 0 ☐ Ich meide das Sonnenbaden seit Langem.

## 2. Sonnencreme:

- 4 ☐ Ich habe nie daran gedacht Sonnencreme zu benutzen.  
 3 ☐ Ich könnte mir vorstellen Sonnencreme zu benutzen.  
 2 ☐ Ich habe die Absicht Sonnencreme zu benutzen.  
 1 ☐ Ich habe angefangen Sonnencreme zu benutzen.  
 0 ☐ Ich benutze Sonnencreme seit Langem.

## 3. Bedeckende Kleidung:

- 4 ☐ Ich habe nie daran gedacht bedeckende Kleidung als Sonnenschutz zu benutzen.  
 3 ☐ Ich könnte mir vorstellen bedeckende Kleidung als Sonnenschutz zu benutzen.  
 2 ☐ Ich habe die Absicht bedeckende Kleidung als Sonnenschutz zu benutzen.  
 1 ☐ Ich habe angefangen bedeckende Kleidung als Sonnenschutz zu benutzen.  
 0 ☐ Ich benutze bedeckende Kleidung als Sonnenschutz seit Langem.

## 4. Sonnenhut oder Kappe:

- 4 ☐ Ich habe nie daran gedacht einen Sonnenhut oder eine Kappe als Sonnenschutz zu benutzen.  
 3 ☐ Ich könnte mir vorstellen einen Sonnenhut oder eine Kappe als Sonnenschutz zu benutzen.  
 2 ☐ Ich habe die Absicht einen Sonnenhut oder eine Kappe als Sonnenschutz zu benutzen.  
 1 ☐ Ich habe angefangen einen Sonnenhut oder eine Kappe als Sonnenschutz zu benutzen.  
 0 ☐ Ich benutze einen Sonnenhut oder eine Kappe als Sonnenschutz seit Langem.

## 5. Schatten:

- 4 ☐ Ich habe nie daran gedacht zu versuchen im Schatten zu bleiben während der Stunden mit dem stärksten Sonnenlicht.  
 3 ☐ Ich könnte mir vorstellen zu versuchen im Schatten zu bleiben während der Stunden mit dem stärksten Sonnenlicht.  
 2 ☐ Ich habe die Absicht zu versuchen im Schatten zu bleiben während der Stunden mit dem stärksten Sonnenlicht.  
 1 ☐ Ich habe angefangen zu versuchen im Schatten zu bleiben während der Stunden mit dem stärksten Sonnenlicht.  
 0 ☐ Ich versuche seit Langem im Schatten zu bleiben während der Stunden mit dem stärksten Sonnenlicht.
